# Supplementary material for: Abortive intussusceptive angiogenesis causes multi-cavernous vascular malformations
Source: eLife journal article supplement (doi:10.7554/elife.62155), 2021-05-20
Supplement: supp [file elife-62155-supp-v1.zip]

Archive with 18 entries (18 files):
- elife_poa_e62155_Video_1.avi
- elife_poa_e62155_Video_2.avi
- elife_poa_e62155_Video_3.avi
- elife_poa_e62155_Video_4.avi
- elife_poa_e62155_Video_5.avi
- elife_poa_e62155_Transparent_Reporting_File.docx
- elife_poa_e62155_Supplementary_file_1.docx
- elife_poa_e62155_Supplementary_file_2.docx
- elife_poa_e62155_Supplementary_file_3.docx
- elife_poa_e62155_Figure_1_figure_supplement_1.pdf
- elife_poa_e62155_Figure_1_figure_supplement_2.pdf
- elife_poa_e62155_Figure_3_figure_supplement_1.pdf
- elife_poa_e62155_Figure_4_figure_supplement_1.pdf
- elife_poa_e62155_Figure_4_figure_supplement_2.pdf
- elife_poa_e62155_Figure_5_figure_supplement_1.pdf
- elife_poa_e62155_Figure_6_figure_supplement_1.pdf
- elife_poa_e62155_Figure_7_figure_supplement_1.pdf
- elife_poa_e62155_Figure_7_figure_supplement_2.pdf
