# Supplementary figures and images for: Abortive intussusceptive angiogenesis causes multi-cavernous vascular malformations
Source: eLife journal article supplement (doi:10.7554/elife.62155), 2021-05-20

Figure 4-figure supplement 2

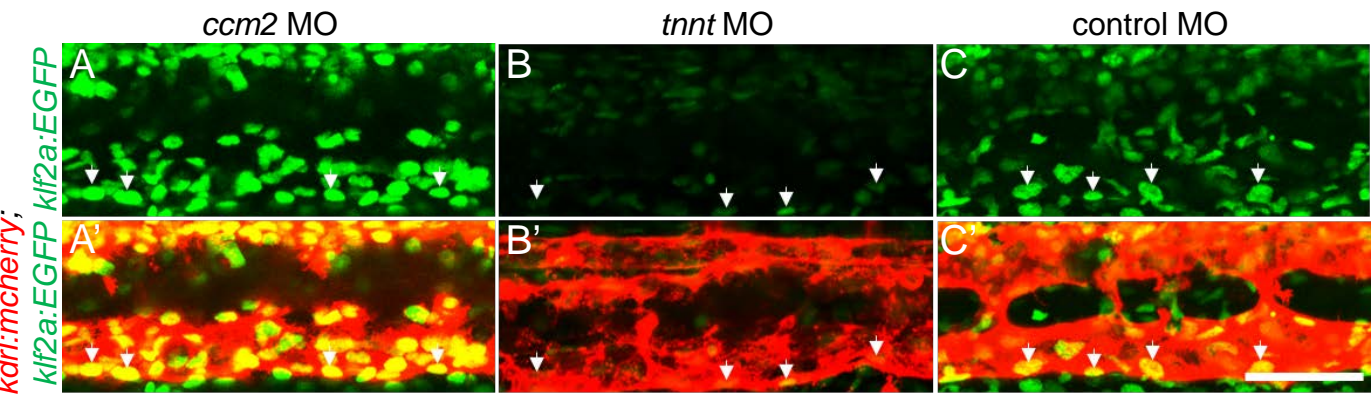

Supplement: supp [file elife-62155-supp-v1.zip]

Figure 4-figure supplement 1

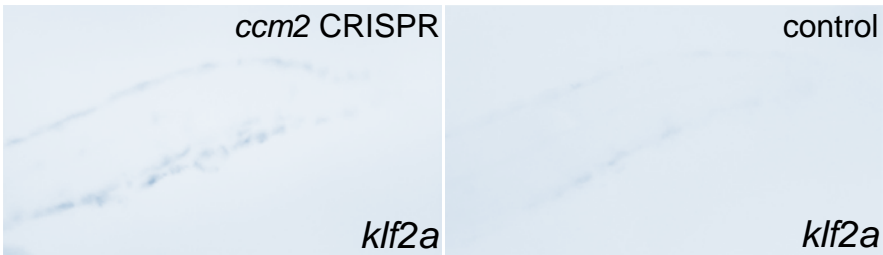

Supplement: supp [file elife-62155-supp-v1.zip]

Figure 7-figure supplement 1

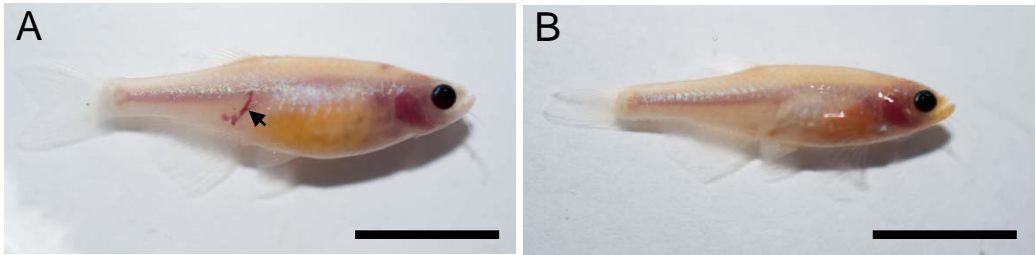

Supplement: supp [file elife-62155-supp-v1.zip]

Figure 1-figure supplement 1

A

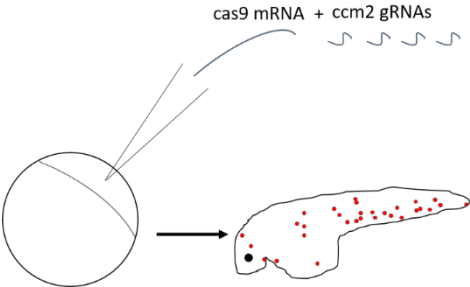

B *ccm2* CRISPR

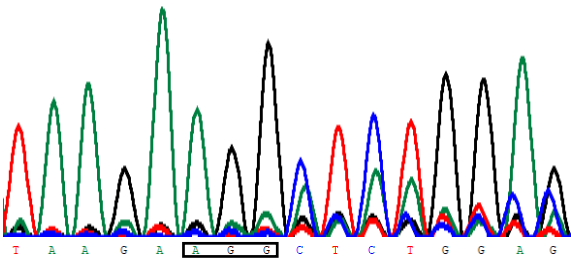

control

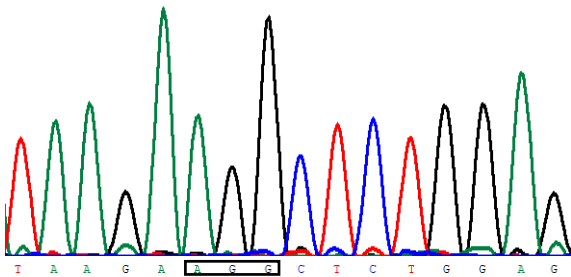

C *ccm2* CRISPR

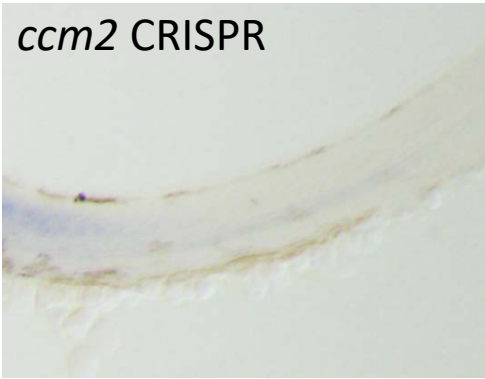

control

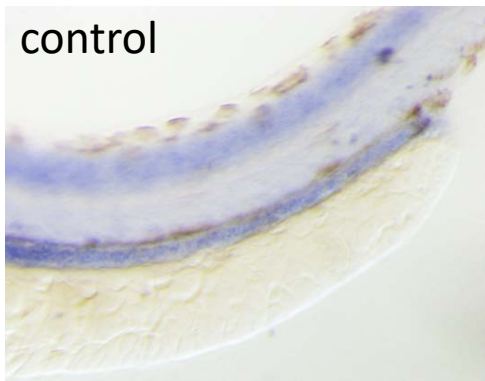

Supplement: supp [file elife-62155-supp-v1.zip]

Figure 5-figure supplement 1

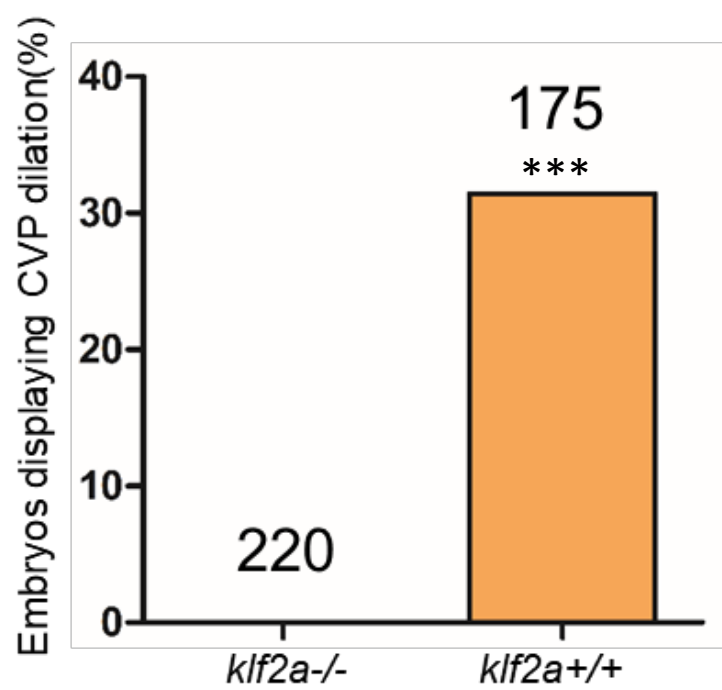

Supplement: supp [file elife-62155-supp-v1.zip]

Figure 3-figure supplement 1

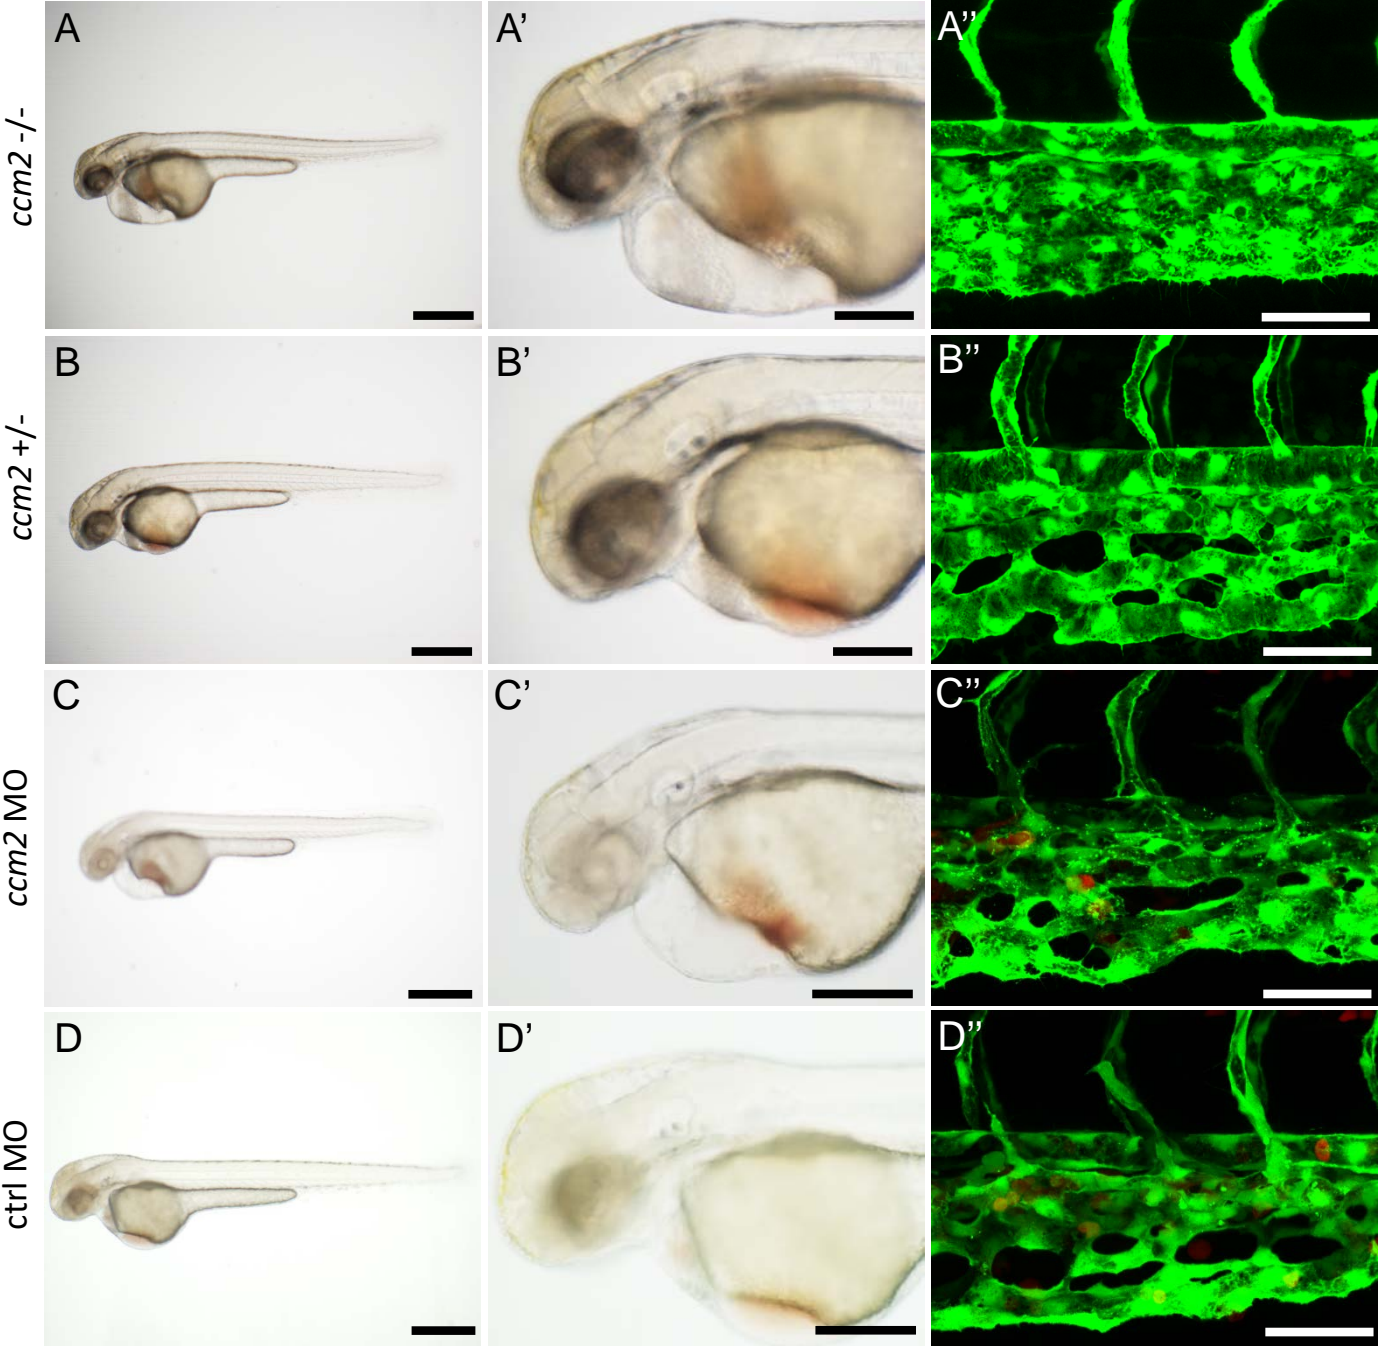

Supplement: supp [file elife-62155-supp-v1.zip]

Figure 6-figure supplement 1

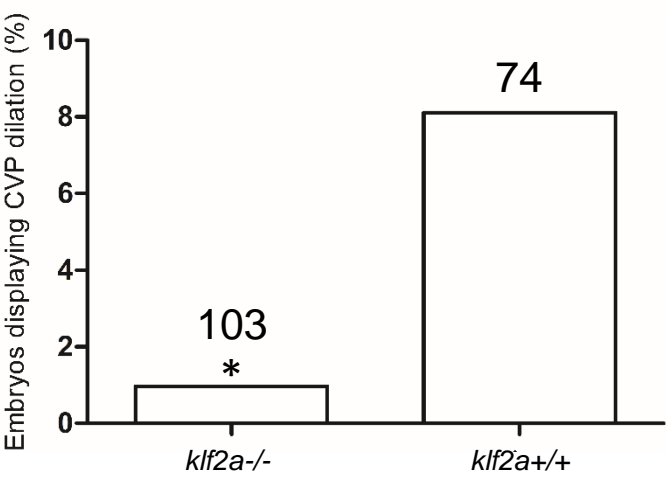

Supplement: supp [file elife-62155-supp-v1.zip]

Figure 1-figure supplement 2

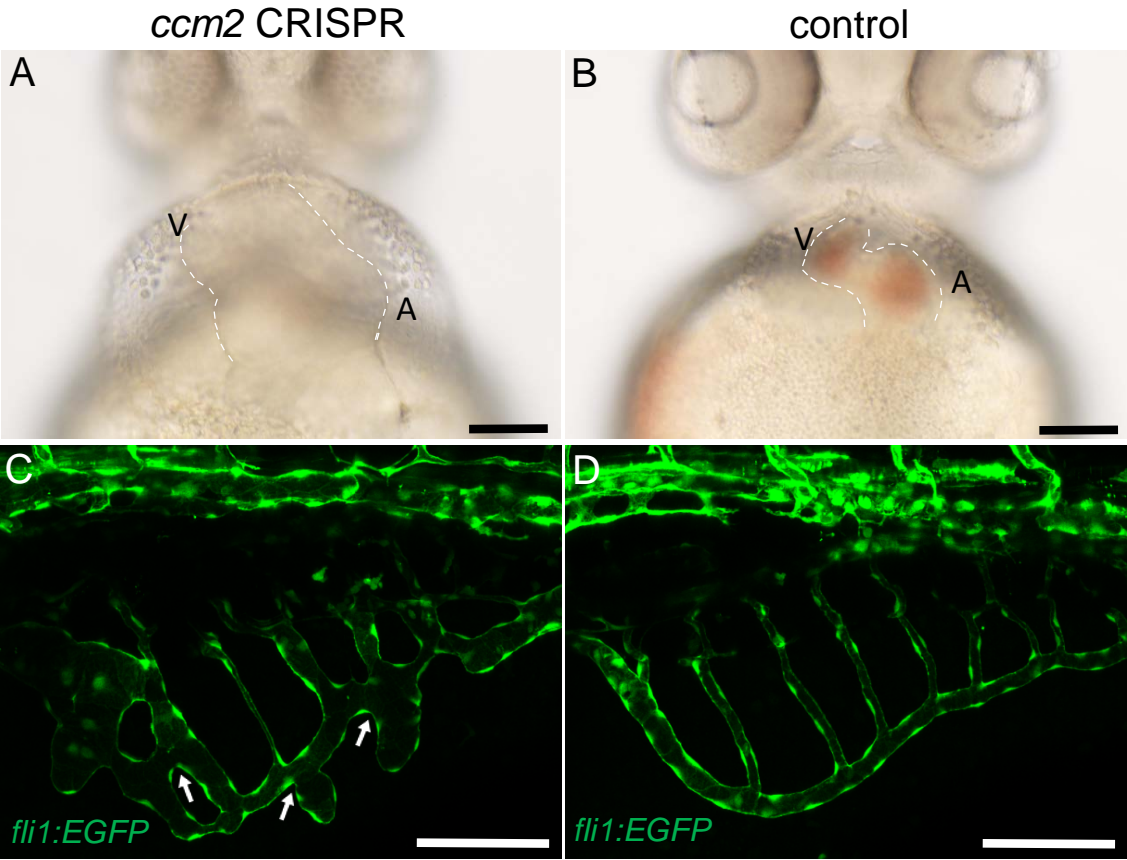

Supplement: supp [file elife-62155-supp-v1.zip]

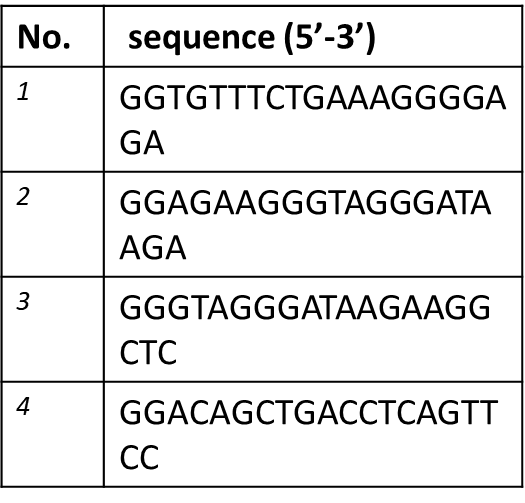


Supplementary Table 2. crRNA sequence for zebrafish *ccm2*

Supplement: supp [file elife-62155-supp-v1.zip › elife_poa_e62155_Supplementary_file_2.docx]

Figure 7-figure supplement 2

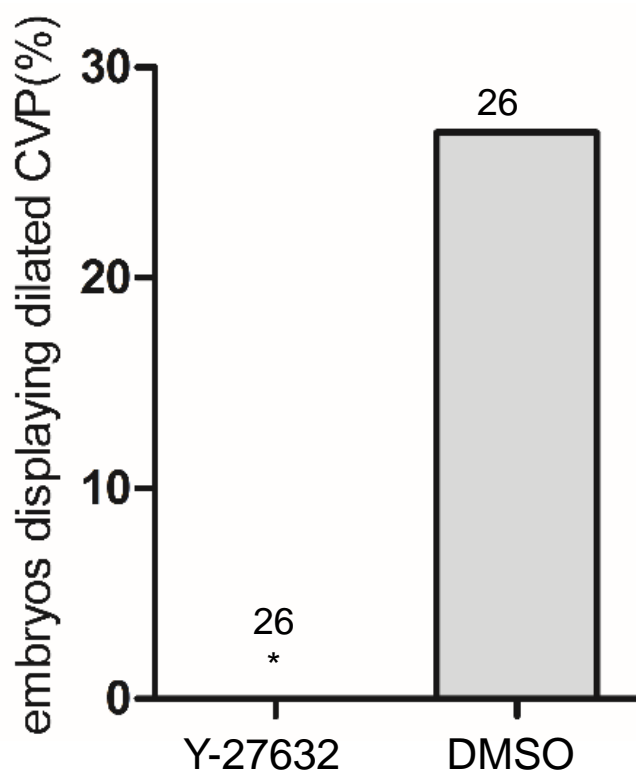

Supplement: supp [file elife-62155-supp-v1.zip › elife_poa_e62155_Figure_7_figure_supplement_2.pdf]
